# Supplementary material for: Declining diurnal temperature range in the North China Plain related to environmental changes
Source: Springer Nature journal article supplement (doi:10.1007/s00382-018-4505-8), 2018-10-19
Supplement: MOESM1 [file 382_2018_4505_MOESM1_ESM.docx]

# ***Supplementary materials for***

**Declining diurnal temperature range in the North China Plain related to environmental changes**

Weitao Xuea, b, Jianping Guob,*, Yong Zhangc, Shunwu Zhoua,*, Yuan Wangd, Yucong Miaob, Lin Liub, Hui Xub, Jian Lib, Dandan Chenb, and Huan Liub

aNanjing University of Information Science & Technology, Nanjing 210044, Jiangsu, China

bState Key Laboratory of Severe Weather, Chinese Academy of Meteorological Sciences, Beijing 100081, China

cMeteorological Observation Center, China Meteorological Administration, Beijing 100081, China

dDivision of Geological and Planetary Sciences, California Institute of Technology, Pasadena, CA 91125, USA

*Correspondence to:

Dr./Prof. Jianping Guo (Email: jpguocams@gmail.com)

Dr./Prof. Shunwu Zhou (Email: zhou@nuist.edu.cn)


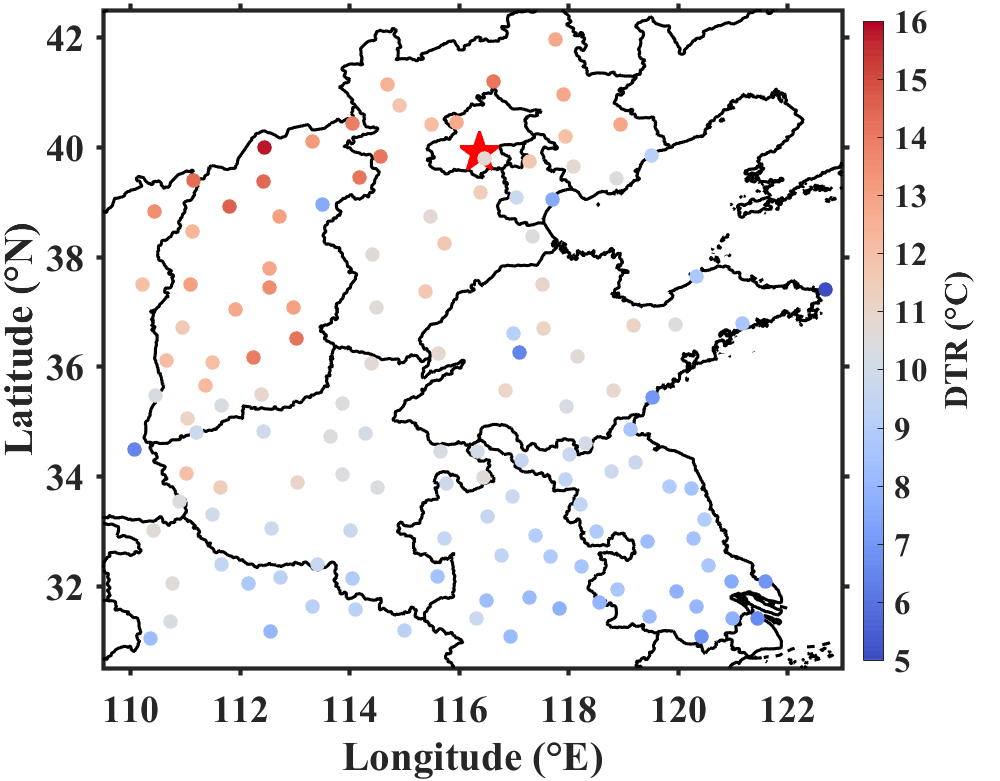


**Figure S1.** Spatial distribution of diurnal temperature range (DTR) in the NCP.


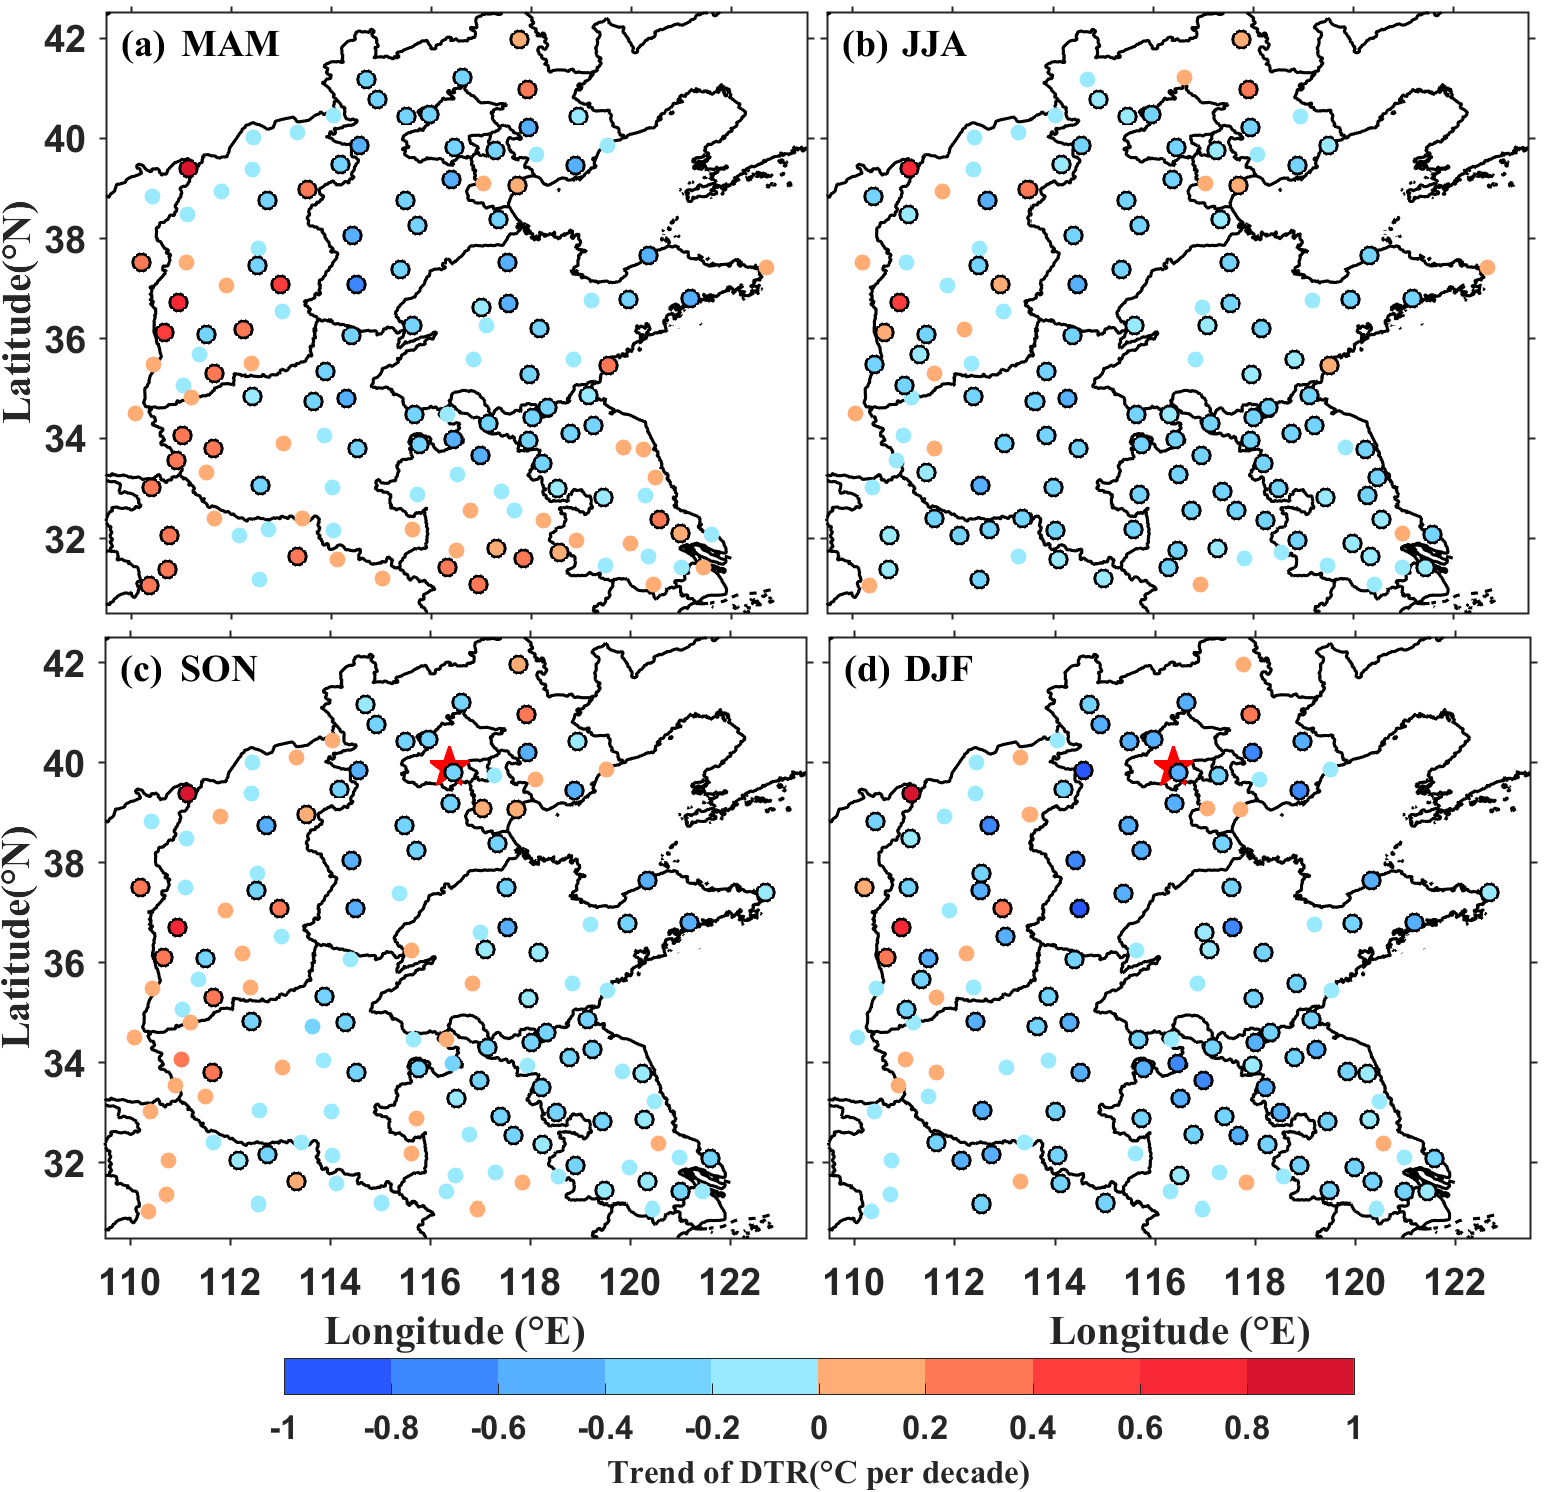


**Figure S2.** Seasonal spatial distribution of the trends of diurnal temperature range (DTR) in the NCP during the period 1960 to 2014.


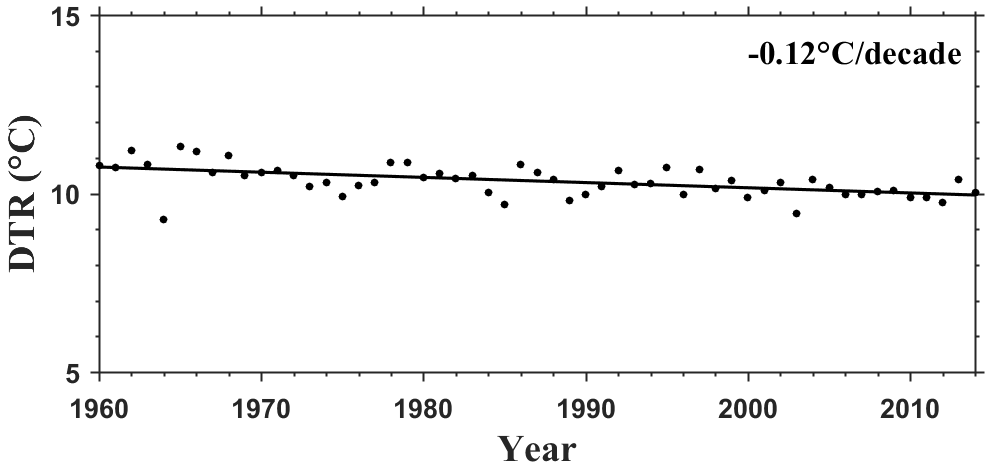


**Figure S3.** Time series of DTR in the NCP during the period 1960 to 2014.


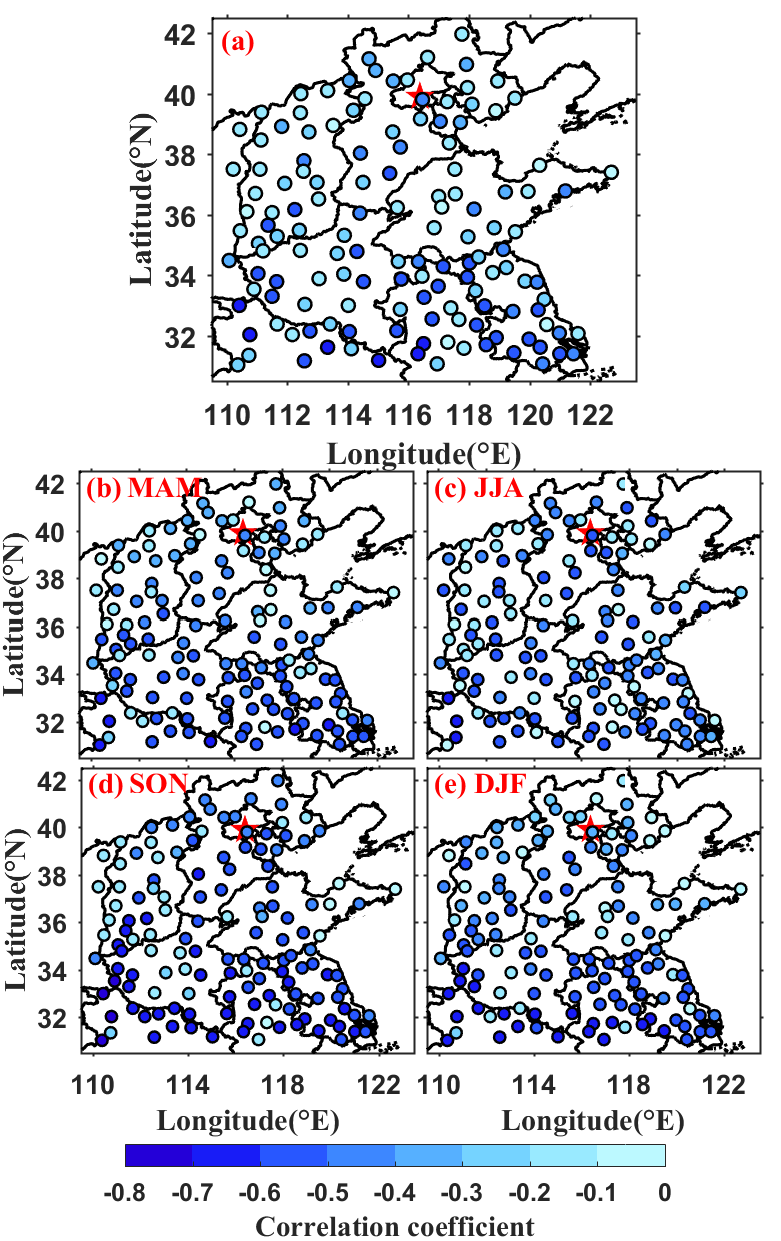


**Figure S4.** Annual and seasonal spatial distribution of correlation coefficient between total cloud cover and DTR in the NCP.


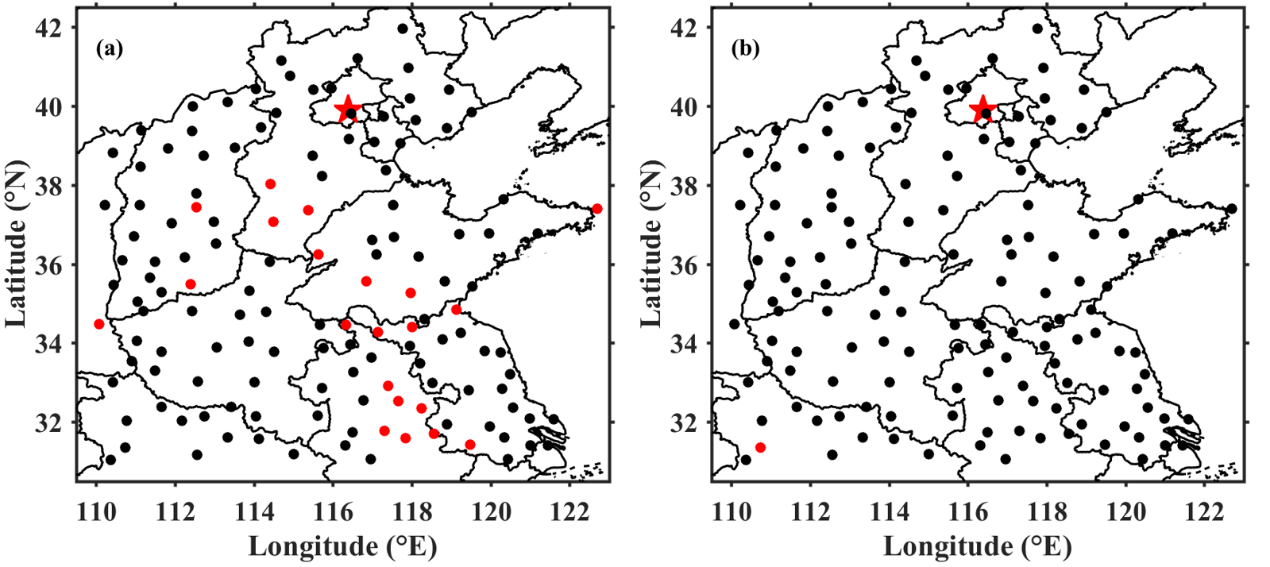


**Figure S5.** Spatial distribution showing whether the ΔTmax (a) and ΔTmin (b) at a given station in the NCP between overcast and clear-sky conditions are statistically significant at the 95% confidence level (black dots) or not (red dots), according to the two-tailed Student's t-test. Red star represents the location of Beijing.


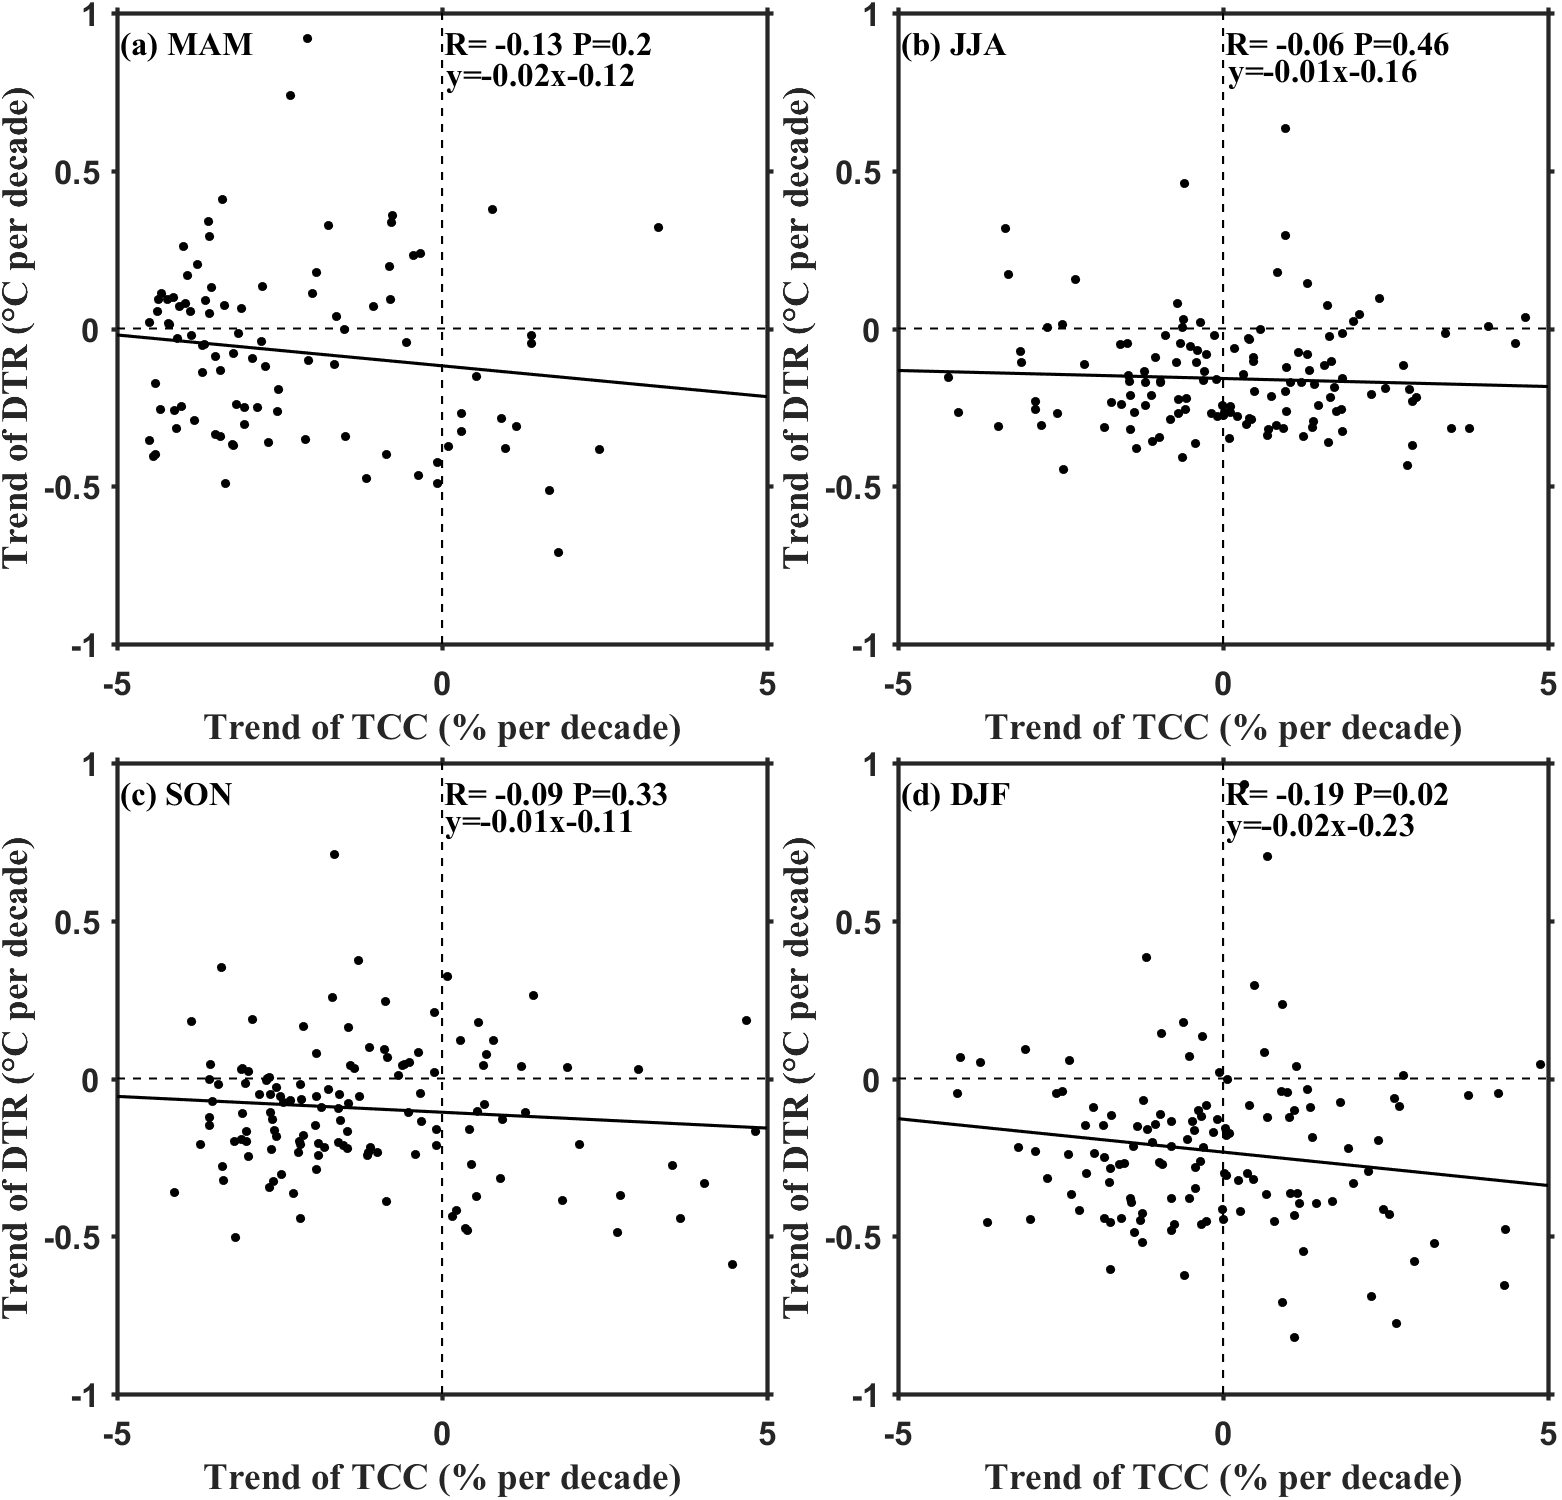


**Figure S6.** Seasonal spatial relationship of the trend of DTR with trend of TCC across the 137 meteorological stations in the NCP. ** denotes that the correlations are significant at 95% confidence level, while those with no asterisk are not statistically significant.

# **
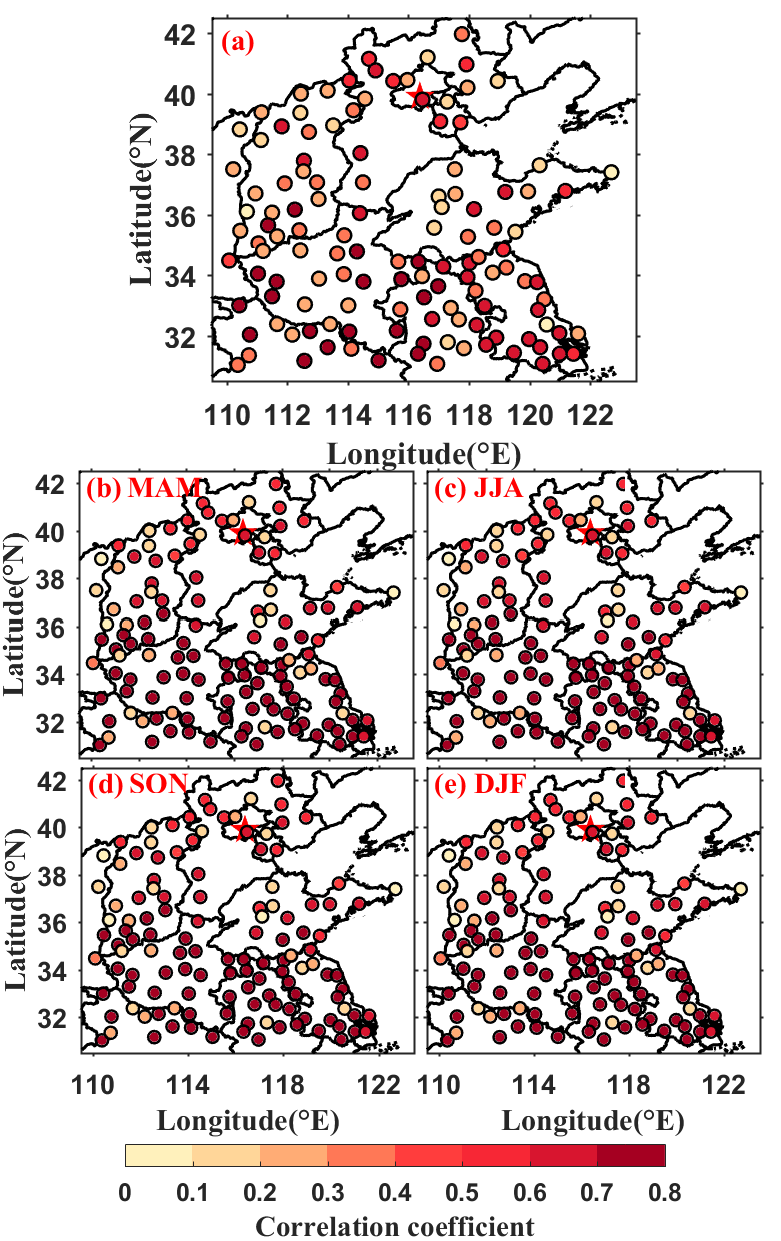
**

**Figure S7.** The spatial distribution of annual and seasonal mean correlation coefficient between sunshine duration and DTR in the NCP.
